# Supplementary material for: A rare case of Mycobacterium Chelonae infection in an immunocompromised adult with cavernous sinus syndrome
Source: PubMed Central journal article supplement (PMC8981426; doi:10.1111/cns.13808), 2022-02-15
Supplement: CNS-28-796-s002.pdf [file CNS-28-796-s002.pdf]

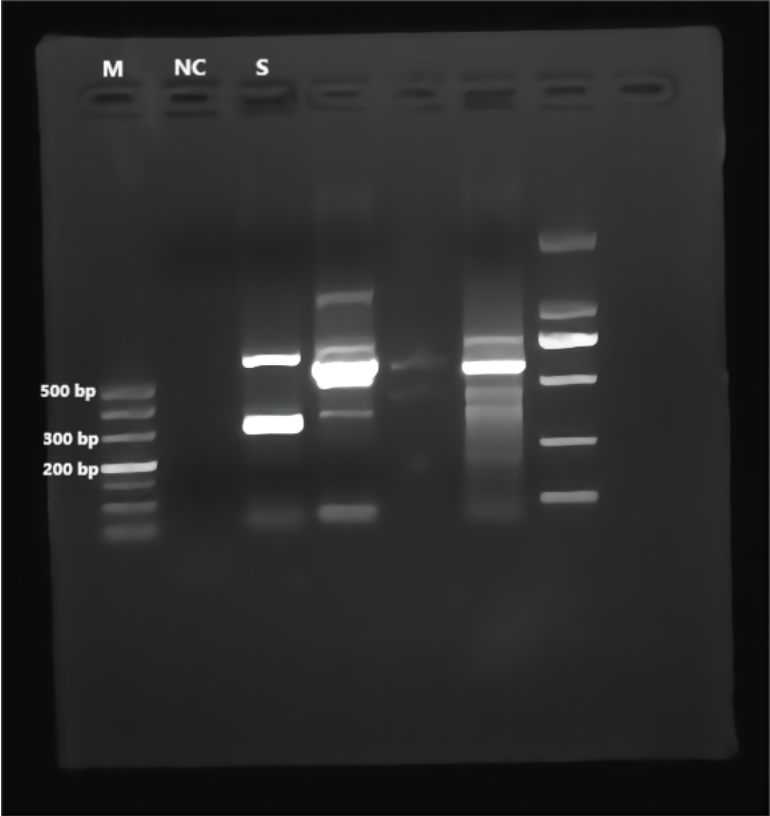

Figure.Full unedited gel for figure 2B
